# Supplementary material for: Involvement of ST6Gal I‐mediated α2,6 sialylation in myoblast proliferation and differentiation
Source: PubMed Central journal article supplement (PMC6943236; doi:10.1002/2211-5463.12745), 2019-12-10
Supplement: FEB4-10-56-s002.pdf [file FEB4-10-56-s002.pdf]

A.

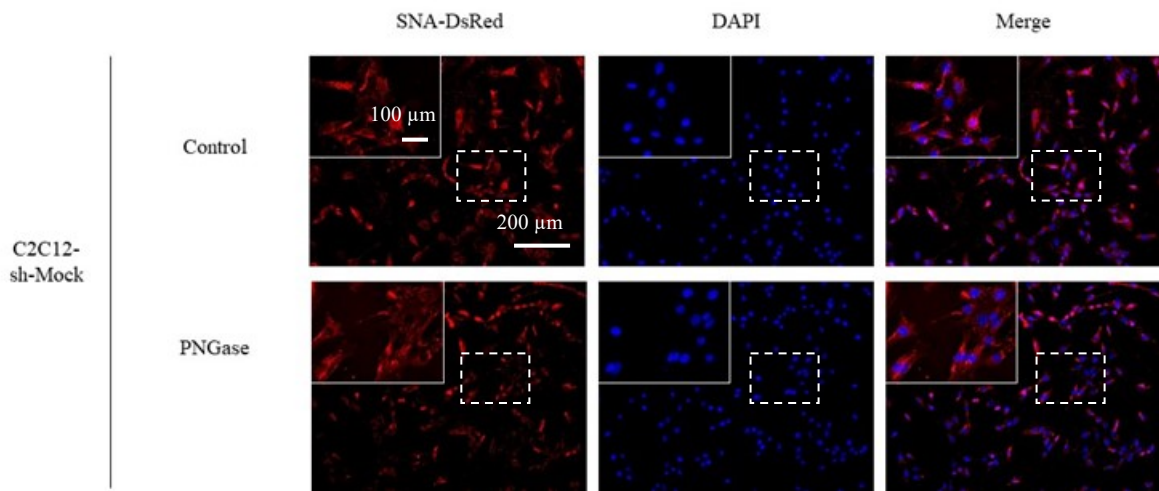

B.

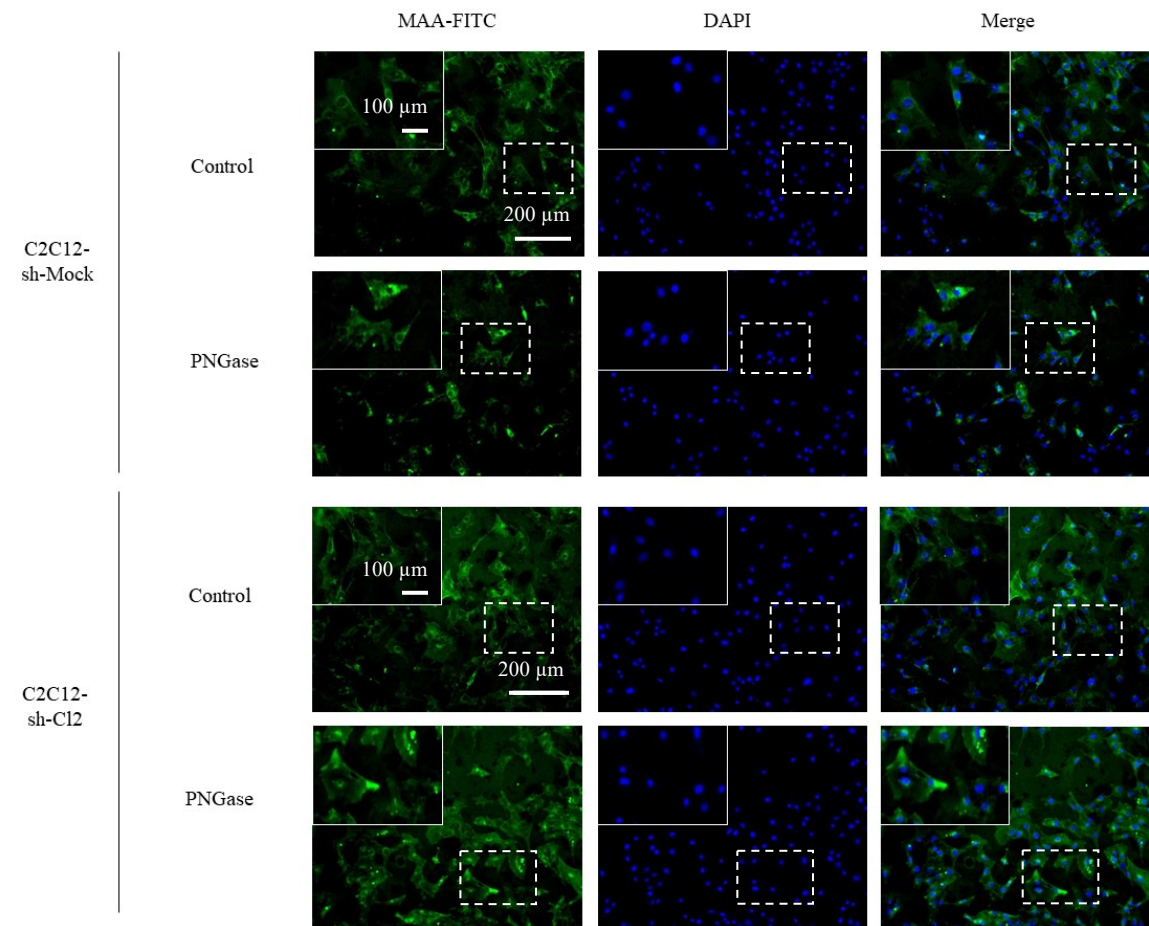

Figure S2
