# Supplementary material for: Involvement of ST6Gal I‐mediated α2,6 sialylation in myoblast proliferation and differentiation
Source: PubMed Central journal article supplement (PMC6943236; doi:10.1002/2211-5463.12745), 2019-12-10
Supplement: FEB4-10-56-s004.pdf [file FEB4-10-56-s004.pdf]

|                           | N-glycan structure         | Mass (m/z) | C2C12-sh-Mock      |                 |             | C2C12-sh-C12       |                 |             |        |
|---------------------------|----------------------------|------------|--------------------|-----------------|-------------|--------------------|-----------------|-------------|--------|
|                           |                            |            | Prolife-<br>ration | Differentiation |             | Prolife-<br>ration | Differentiation |             |        |
|                           |                            |            |                    | 120 h MT        | 120 h RC+MB |                    | 120 h MT        | 120 h RC+MB |        |
| Oligomannosylated glycans |                            | 1579       | 242.81             | 29.61           | 167.45      | 122.99             | 31.13           | 235.65      |        |
|                           |                            | 1783       | 156.52             | 28.87           | 176.23      | 151.42             | 39.41           | 403.92      |        |
|                           |                            | 1988       | 94.02              | 9.29            | 83.7        | 70.74              | 11.3            | 166.76      |        |
|                           |                            | 2192       | 91.95              | 10.91           | 103.91      | 76.65              | 14.09           | 202.85      |        |
|                           |                            | 2395       | 87.63              | 9.67            | 104.44      | 51.92              | 0               | 184.71      |        |
| Complex glycans           | Neu-<br>tral               |            | 2519               | 75.76           | 0           | 65.33              | 55.6            | 0           | 90.84  |
|                           | Fucosylated                |            | 2693               | 76.43           | 0           | 82.69              | 64.64           | 0           | 111    |
|                           |                            |            | 2839               | 83.39           | 0           | 79.01              | 0               | 0           | 0      |
|                           | Sialylated                 |            | 2792               | 336.4           | 610.85      | 278.92             | 215.85          | 303.82      | 249.27 |
|                           |                            |            | 3037               | 0               | 55.44       | 0                  | 27.59           | 0           | 0      |
|                           |                            |            | 3242               | 100.45          | 169.24      | 69.61              | 71.57           | 74.16       | 51.52  |
|                           |                            |            | 3604               | 494.64          | 331.88      | 377.62             | 345.26          | 337.53      | 237.58 |
|                           |                            |            | 3966               | 127.83          | 82.05       | 151.39             | 73.98           | 72.61       | 68.86  |
|                           | Fucosylated and sialylated |            | 2605               | 122.38          | 81.2        | 122.77             | 65.15           | 83.33       | 189.2  |
|                           |                            |            | 3053               | 0               | 0           | 23.88              | 0               | 0           | 28.86  |
|                           |                            |            | 2966               | 62.09           | 40.63       | 59.75              | 36.86           | 45.15       | 115.85 |
|                           |                            |            | 2778               | 168.63          | 230         | 146.32             | 95.73           | 142.85      | 92.14  |
|                           |                            |            | 2822               | 85.47           | 167.58      | 64.68              | 57.09           | 98.99       | 0      |
|                           |                            |            | 3023               | 0               | 50.52       | 44.73              | 0               | 0           | 0      |
|                           |                            |            | 3228               | 49.62           | 68.8        | 136.62             | 27.94           | 37.31       | 46.75  |
| <b>Total</b>              |                            |            | 2456.02            | 1976.54         | 2339.05     | 1610.98            | 1291.68         | 2475.76     |        |

Figure S4

**Structures of *N*-glycans identified by MS/MS spectrometry.** The identified glycans are classified according to their structure (oligomannose or complex) and their glycosylation state (fucosylated and/or sialylated). Each peak area is specified for C2C12-sh-Mock and C2C12-sh-C12 cells in proliferation (P) and in myotubes (MT) or in the mix of reserve cells (RC) and myoblasts (MB).
