# Supplementary material for: Involvement of ST6Gal I‐mediated α2,6 sialylation in myoblast proliferation and differentiation
Source: PubMed Central journal article supplement (PMC6943236; doi:10.1002/2211-5463.12745), 2019-12-10
Supplement: FEB4-10-56-s005.pdf [file FEB4-10-56-s005.pdf]

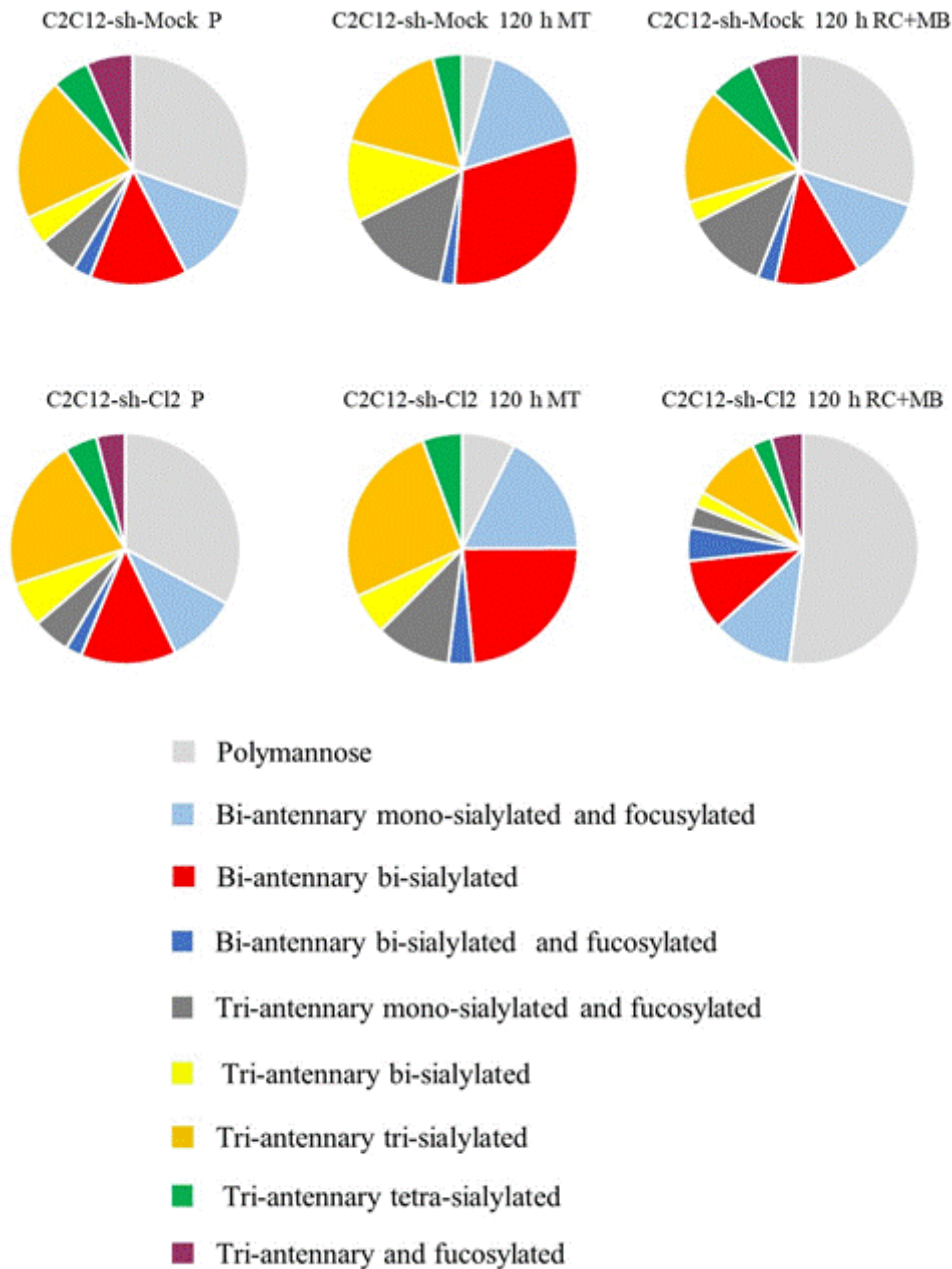

**Figure S5**

**Distribution relative of *N*-glycans in C2C12-sh-Mock and C2C12-sh-C12 cells.** Parts of each type of *N*-glycans identified by MS/MS spectrometry are given for proliferating myoblasts (P), and at 120 hours of differentiation for myotubes (MT), and the mix of reserve cells (RC) and myoblasts (MB) for C2C12-sh-Mock and C2C12-sh-C12 cells.
